# Supplementary material for: Changing molecular conjugation with a phenazine acceptor for improvement of small molecule-based organic electronic memory performance
Source: Royal Society of Chemistry journal article supplement (doi:10.1039/c7ra11932a), 2018-01-01
Supplement: c7ra11932a1.pdf [file c7ra11932a1.pdf]

## Supporting Information

### **Changing molecular conjugation with phenazine acceptor for small molecule-based organic electronic memory performance**

*Quan Liu, \*<sup>a</sup> Caibin Zhao,<sup>a</sup> Guanghui Tian<sup>a</sup> and Hongguang Ge<sup>a</sup>*

*a. Shaanxi Province Key Laboratory of Catalytic Foundations and Applications, School of Chemical and Environmental Science, Shaanxi University of Technology, Hanzhong, 723001, China*

*Tel: +86 916 2641660; E-mail: liuq@snut.edu.cn*

### *Contents*

|                                                                                                    |              |
|----------------------------------------------------------------------------------------------------|--------------|
| <i>MS and NMR spectra of compounds .....</i>                                                       | <i>S2-S6</i> |
| <i>The I–V characteristics of the memory devices use LiF as block layer .....</i>                  | <i>S7</i>    |
| <i>The long-term stability of the memory devices under ambient condition .....</i>                 | <i>S8</i>    |
| <i>The memory behavior of the flexible memory devices under different bending conditions .....</i> | <i>S9</i>    |

### $^{19}\text{F}$ NMR of compound 1

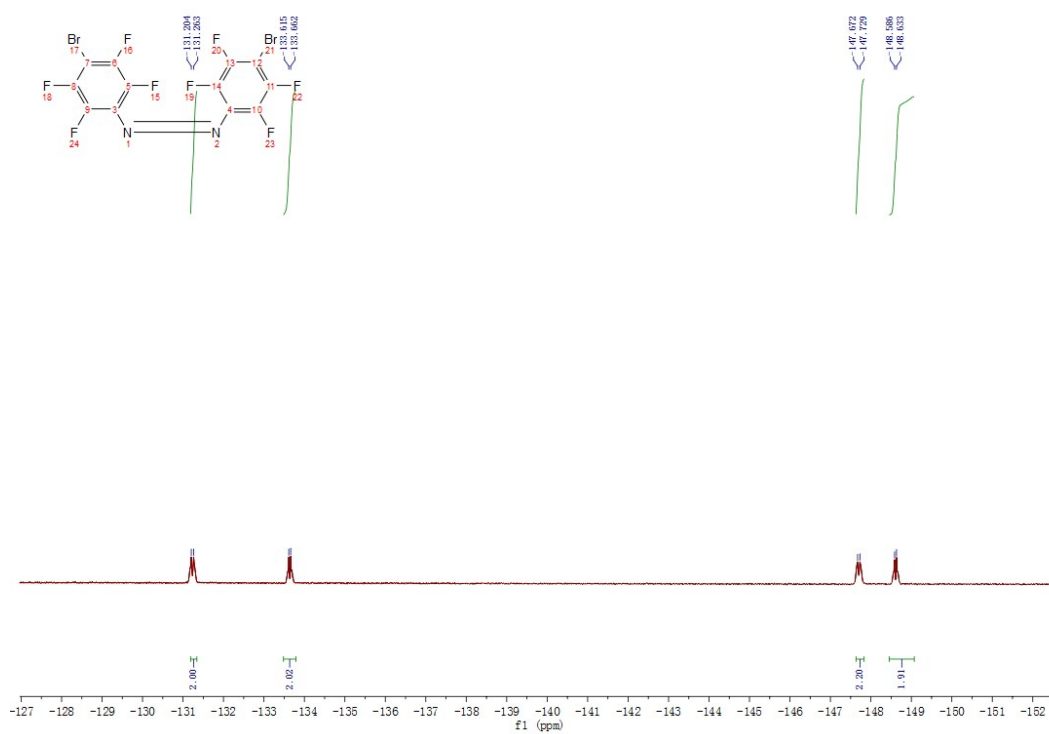

### $^{19}\text{F}$ NMR of compound 2

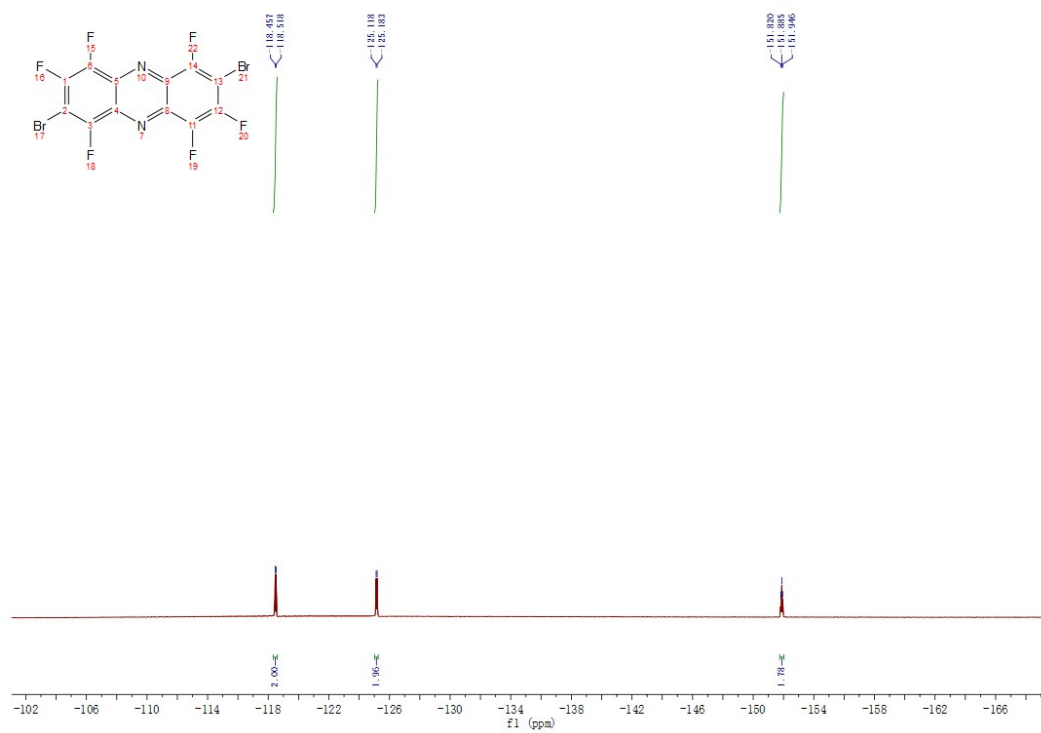

$^1\text{H}$  NMR of compound *TPA-azo-TPA*

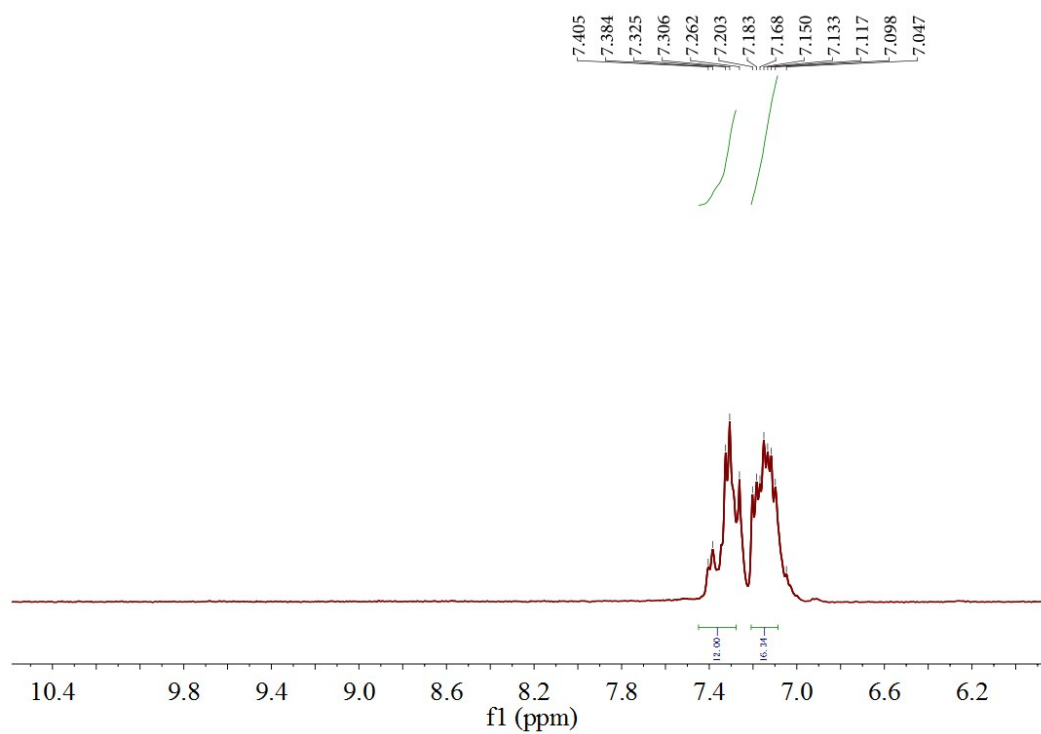

$^{13}\text{C}$  NMR of compound *TPA-azo-TPA*

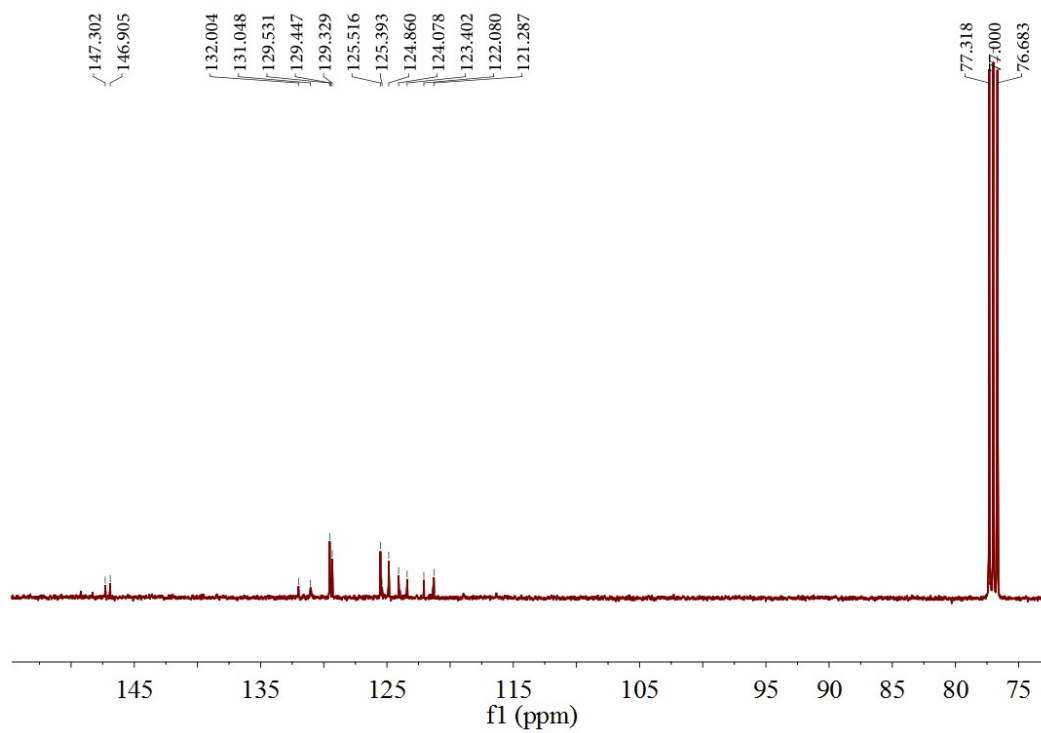

$^{19}\text{F}$  NMR of compound *TPA-azo-TPA*

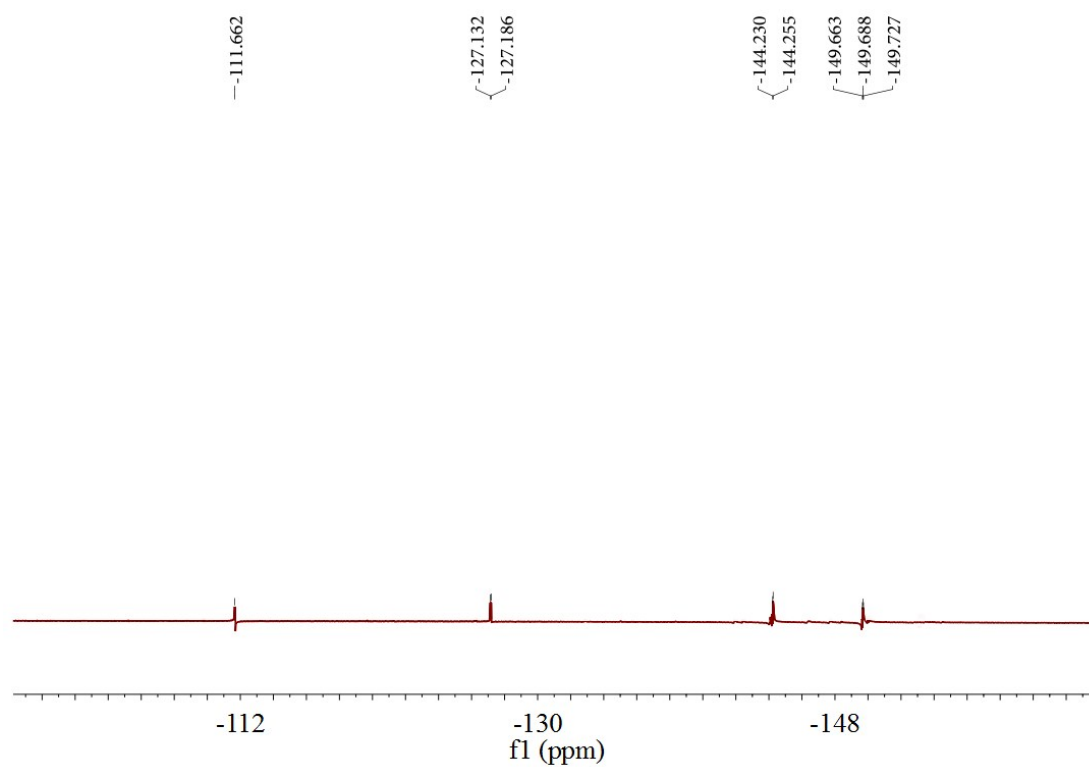

MS of compound *TPA-azo-TPA*

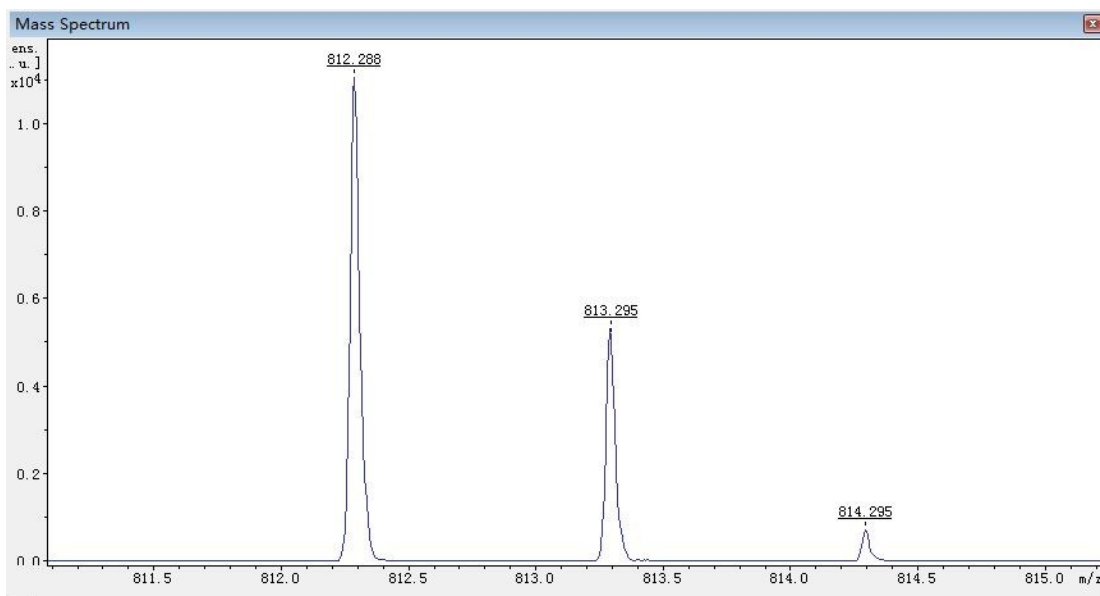

$^1\text{H}$  NMR of compound *TPA-ph-TPA*

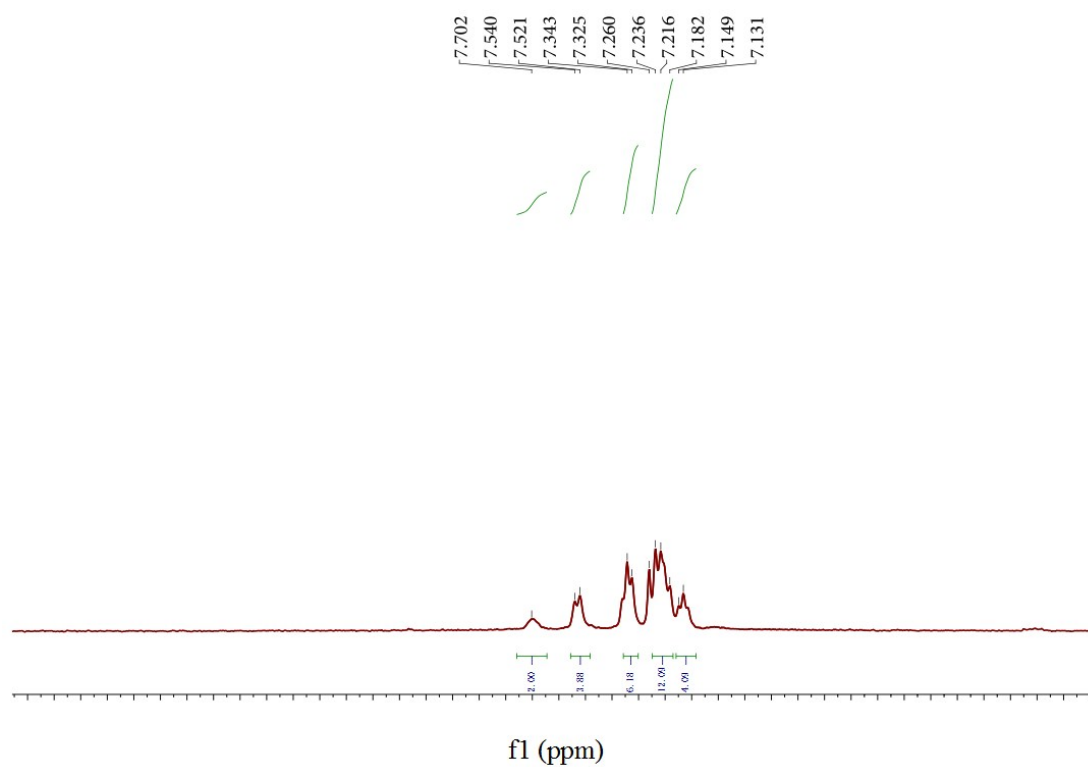

$^{13}\text{C}$  NMR of compound *TPA-ph-TPA*

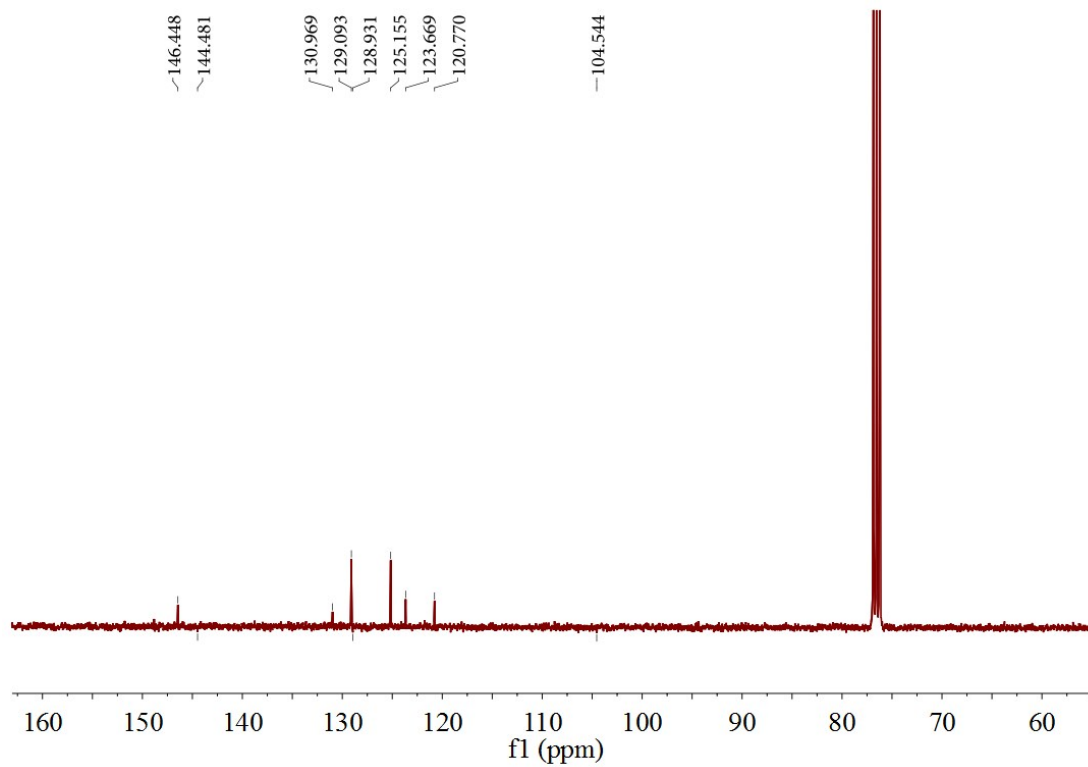

$^{19}\text{F}$  NMR of compound *TPA-ph-TPA*

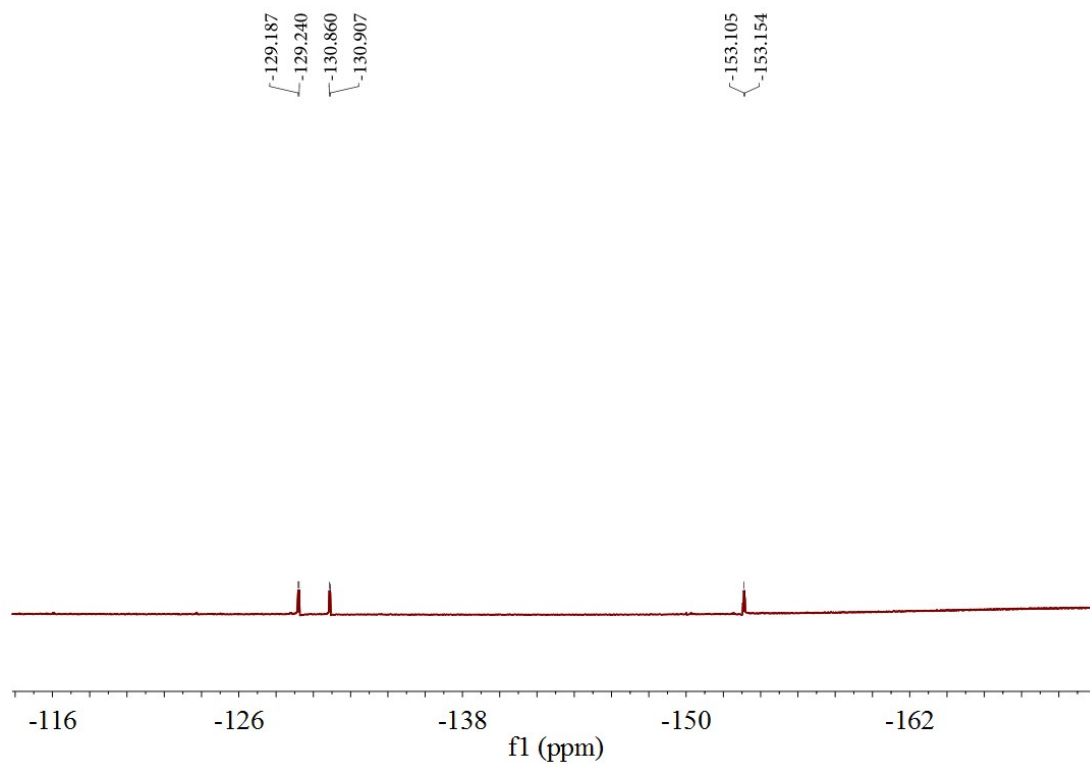

MS of compound *TPA-ph-TPA*

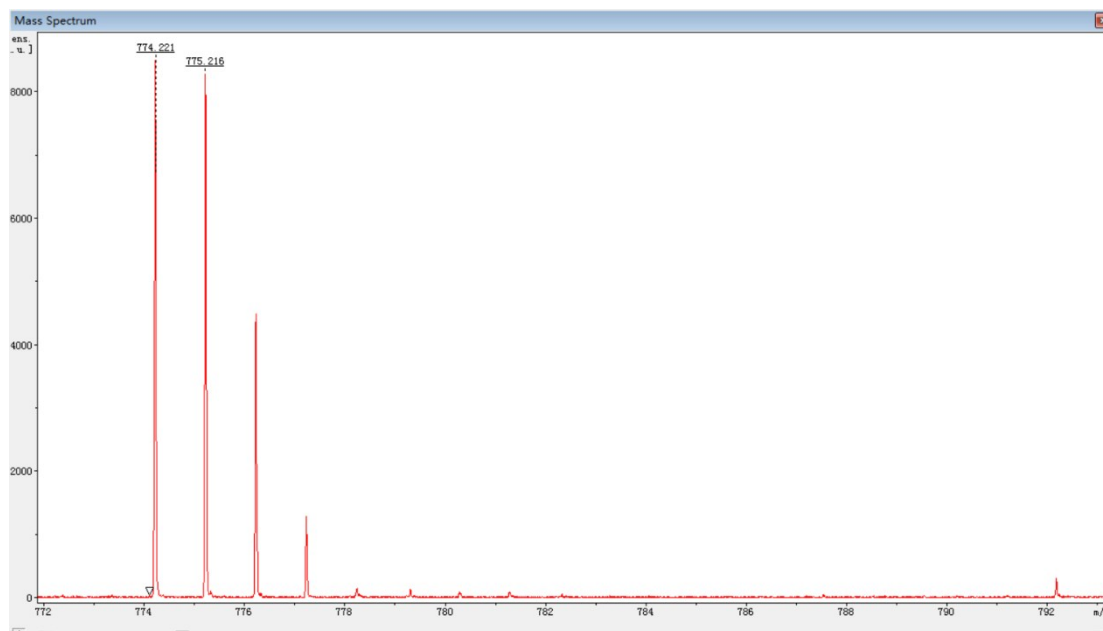

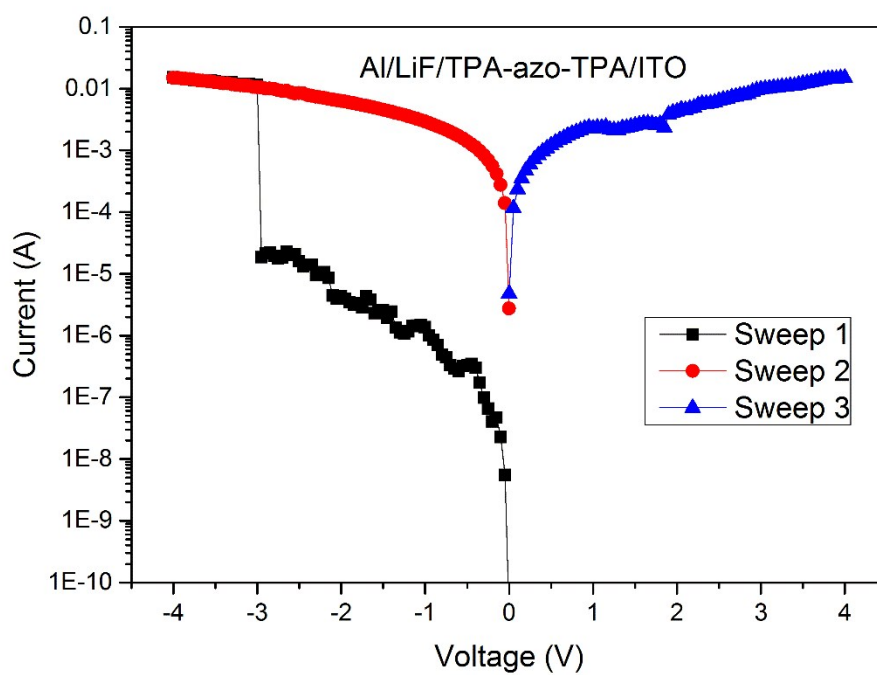

**Figure S1** I-V characteristics of Al /LiF (5 nm)/ TPA-azo-TPA / ITO memory devices.

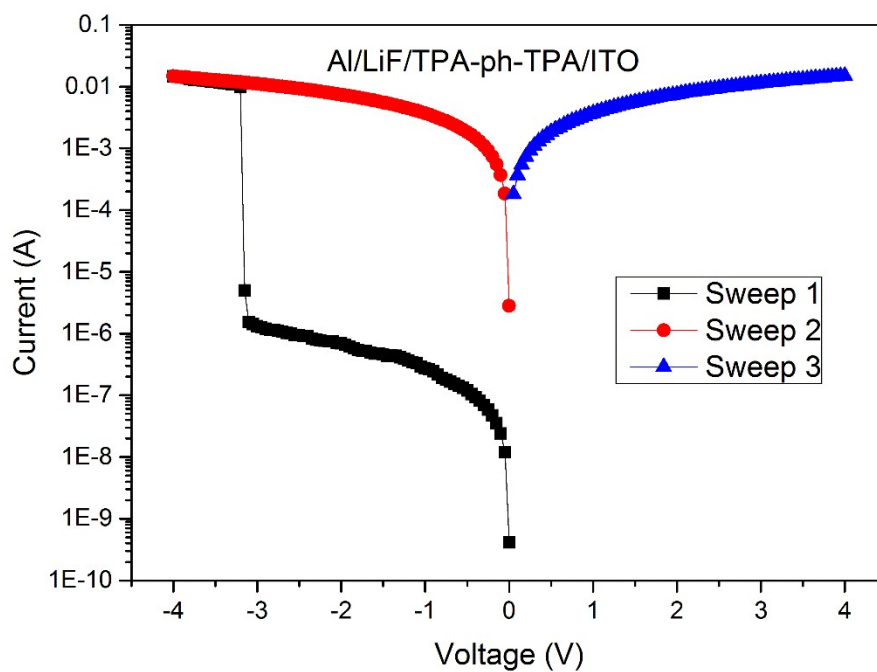

**Figure S2** I-V characteristics of Al /LiF (5 nm)/ TPA-ph-TPA / ITO memory devices.

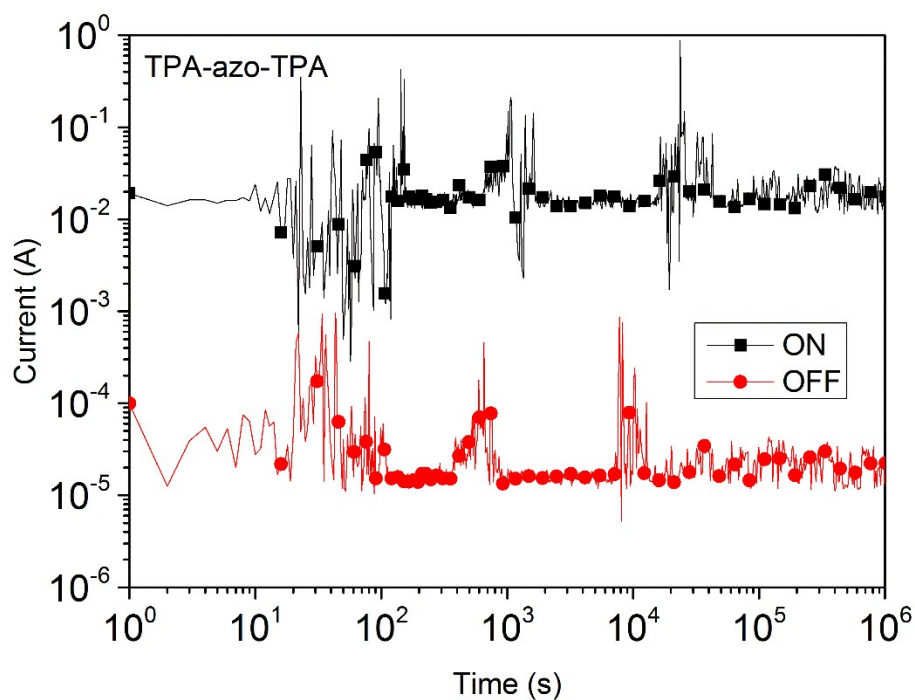

**Figure S3** The effect of retention time of Al/ TPA-azo-TPA /ITO-based memory device under a constant stress of -1.0 V in air and humidity condition.

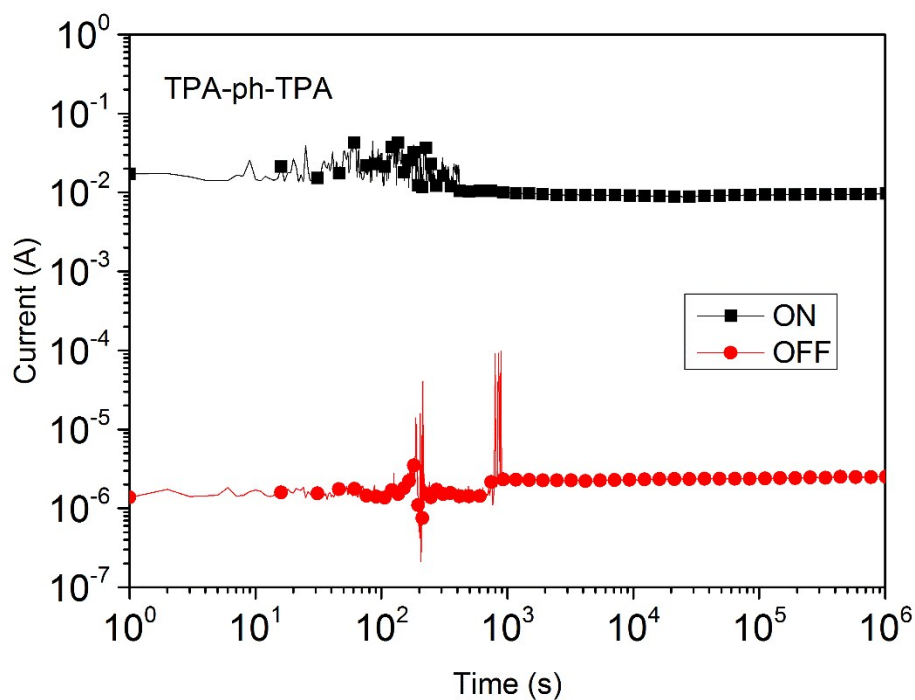

**Figure S4** The effect of retention time of Al/ TPA-ph-TPA /ITO-based memory device under a constant stress of -1.0 V in air and humidity condition.



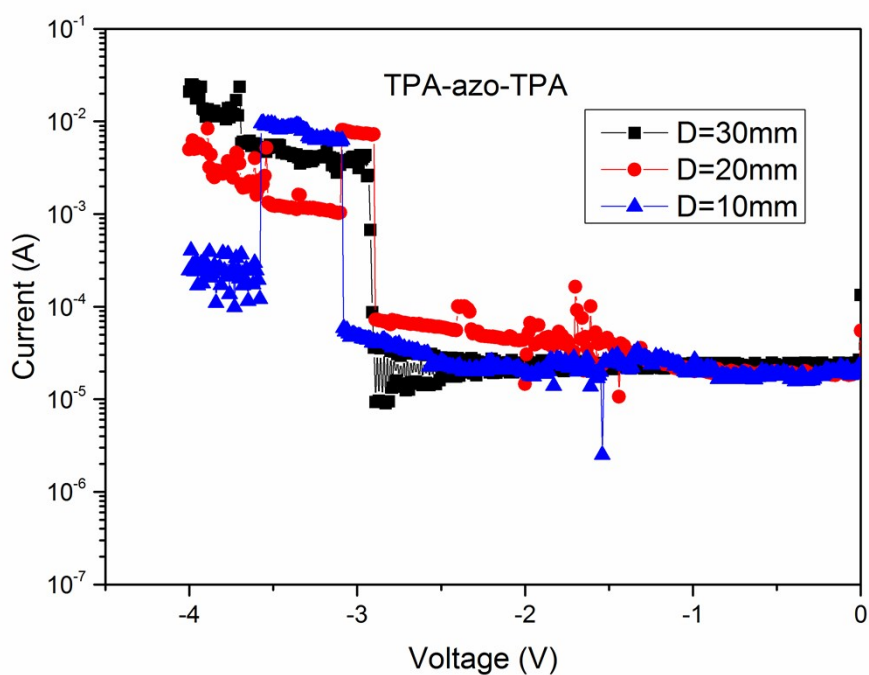

**Figure S5** The memory effects of the Al/ TPA-azo-TPA /Al-based flexible memory devices in different bending degrees. the distance between the end of the arc define as (D).

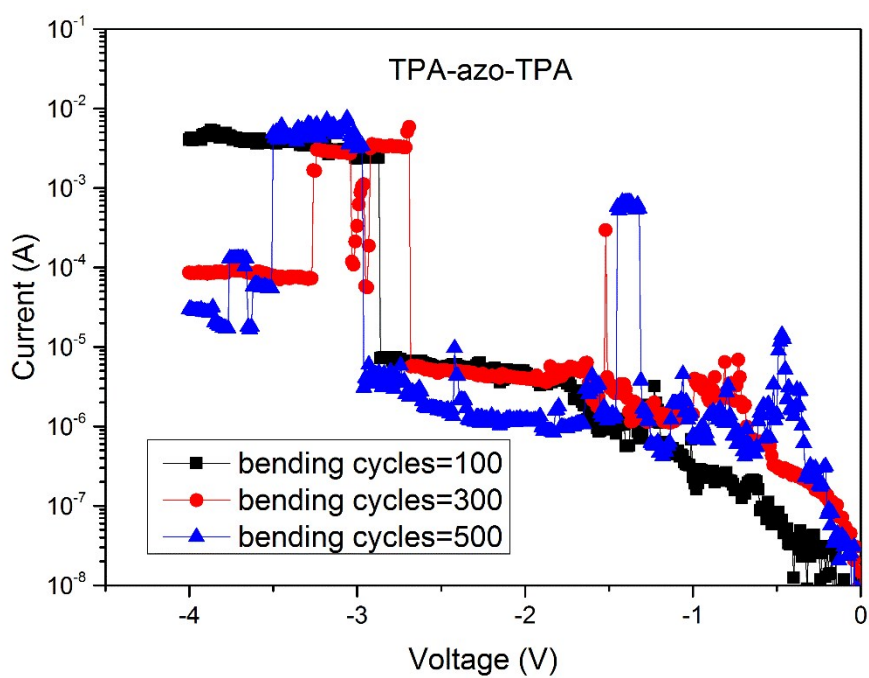

**Figure S6** The memory effects of the Al/ TPA-azo-TPA /Al-based flexible memory devices under different bending cycles in the maximum bending condition.
